# Supplementary material for: Ultra-small iridium nanoparticles as active catalysts for the selective and efficient reduction of nitroarenes
Source: Royal Society of Chemistry journal article supplement (doi:10.1039/d0nj03621h), 2020-01-01
Supplement: d0nj03621h1.pdf [file d0nj03621h1.pdf]

## Electronic Supplementary Information

### **Ultra-small iridium nanoparticles as active catalysts for selective and efficient reduction of nitroarenes**

Malin Cui,\* Xiaojing Huang, Xiaoyan Zhang, Qingfan Xie, Dapeng Yang\*

*College of Chemical Engineering and Materials Science, Quanzhou Normal  
University, Quanzhou 362000, China*

\*Corresponding author, E-mail: [malincui@qztc.edu.cn](mailto:malincui@qztc.edu.cn) (Ma-Lin Cui) and [yangdp@qztc.edu.cn](mailto:yangdp@qztc.edu.cn)  
(Da-Peng Yang).

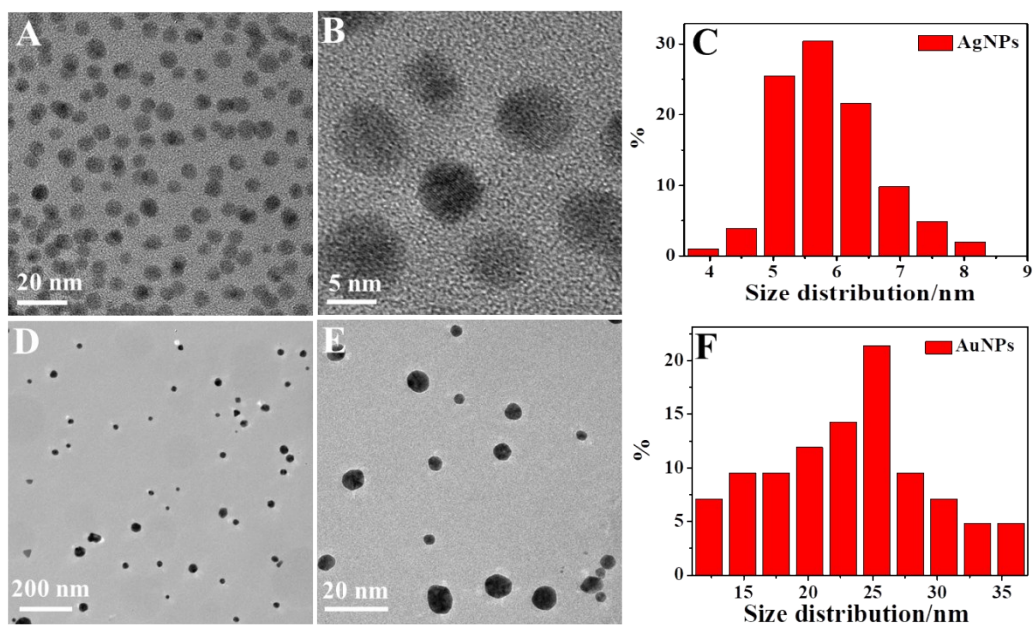

**Fig. 1S** The TEM images of (A, B) AgNPs and (D, E) AuNPs under different magnifications, Size distribution analysis of the (C) AgNPs and (F) AuNPs from 100 random nanoparticles, respectively.
